# Supplementary material for: Estimating malaria incidence from routine health facility-based surveillance data in Uganda
Source: Malar J. 2020 Dec 2;19:445. doi: 10.1186/s12936-020-03514-z (PMC7709253; doi:10.1186/s12936-020-03514-z)
Supplement: Supplementary file 1 — Additional file 1: Data for care-seeking model. [file 12936_2020_3514_MOESM1_ESM.xlsx]

## Sheet:  
site	village	traveltime	pop_hrsl	pop_afripop	pop_landscan	count
nagongera	219150404	8.24642	1075.43	1183.55	211	21
nagongera	219150202	1.1537	1557.71	2074.27	3792	58
nagongera	219150403	5.70618	521.086	735.829	390	11
nagongera	219150101	2.47765	1541.08	1813.05	487	319
nagongera	219150201	1.96121	1502.28	1575.95	3676	175
nagongera	219150401	12.8468	1502.28	1869.23	699	17
nagongera	219140309	9.22991	831.519	1451.38	1757	67
nagongera	219150302	3.11608	1879.23	2012.67	2735	215
nagongera	219140113	10.5246	1241.74	1414.52	1798	6
nagongera	219140311	5.39332	903.584	1846.58	1334	11
nagongera	219150301	4.11118	1164.13	1418.83	779	122
nagongera	219140123	9.07711	970.106	1307.25	676	17
nagongera	219140112	20.1434	1186.3	1600.25	754	40
nagongera	219140207	6.56274	1119.78	1284.54	876	67
nagongera	219140102	12.9679	1064.34	1173.94	995	18
nagongera	219140208	2.85309	947.932	829.107	970	14
nagongera	219140111	17.3014	471.194	509.526	459	17
nagongera	219140117	16.429	715.107	741.709	1136	5
nagongera	219140120	9.0771	764.998	664.677	1284	1
nagongera	219140114	11.6859	947.932	1189.27	1374	14
nagongera	219150303	8.12962	1236.19	1136.73	791	130
nagongera	219140312	16.9062	1031.08	741.962	834	12
nagongera	219140304	7.275	1069.89	766.08	914	54
nagongera	219140306	8.19728	327.064	1192.19	1388	16
nagongera	219140301	9.34827	764.998	761.755	667	17
nagongera	219140308	13.4948	1252.82	921.362	668	31
nagongera	219140204	13.3367	1313.8	1309.53	2270	83
nagongera	219140215	7.67876	709.563	565.815	2558	13
nagongera	219140109	14.4992	742.824	1002.18	891	1
nagongera	219140121	21.0073	1552.17	1609.2	768	17
kihihi	150130105	20.4672	351.188	525.98	128	5
kihihi	150130104	24.7807	337.681	216.708	227	4
kihihi	150080106	10.7524	499.768	531.223	169	11
kihihi	150080103	16.2024	540.29	189.031	230	8
kihihi	150090204	0	1067.07	681.867	2644	127
kihihi	150090206	1.57199	330.927	305.811	3674	26
kihihi	150090408	2.21149	553.797	633.518	412	78
kihihi	150080102	6.03927	891.478	1060.96	214	115
kihihi	150090402	16.268	459.246	453.121	1766	22
kihihi	150080104	13.5865	540.29	303.498	39	30
kihihi	150090401	7.37313	742.898	544.658	2781	43
kihihi	150080302	9.67527	486.261	1015.41	452	19
kihihi	150090304	7.13857	276.898	467.13	304	18
kihihi	150090307	12.0594	553.797	200.931	465	47
kihihi	150090205	3.36494	688.869	478.225	1109	49
kihihi	150090202	1.1131	229.623	106.372	3425	40
kihihi	150130209	17.2826	506.521	415.818	113	25
kihihi	150090208	7.58534	1073.83	1159.16	980	58
kihihi	150130102	39.786	486.261	432.584	169	24
kihihi	150090406	16.1456	337.681	430.37	319	40
kihihi	150090405	21.3654	256.638	306.285	5	14
kihihi	150090404	13.9002	276.898	617.756	995	53
kihihi	150130207	16.2327	499.768	349.753	7	6
kihihi	150080101	17.1802	513.275	278.255	132	14
kihihi	150130404	18.3305	398.464	438.195	119	2
kihihi	150130403	29.7482	398.464	572.545	37	3
kihihi	150080303	9.43622	648.347	1373.19	601	38
kihihi	150090207	1.89391	749.652	509.965	4928	83
kihihi	150090203	2.06154	1148.12	533.33	5299	56
kihihi	150130402	16.3693	384.956	402.795	125	1
